# Supplementary material
Source: publisher site journal article supplement (https://www.degruyterbrill.com/publication/isbn/9783050075075/downloadAsset/9783050075075_Zusatzmaterialien_Leseprobe.pdf)
Supplement: Supplementary file 1 [file 9783050075075_Zusatzmaterialien_Leseprobe.pdf]

Brandt

Geschichte der römischen  
Kaiserzeit 284–363

# STUDIENBÜCHER

Geschichte und Kultur  
der Alten Welt

Herausgegeben von

Klaus Bringmann

Elisabeth Erdmann

Klaus M. Girardet

Gustav Adolf Lehmann

Ulrich Sinn

Karl Strobel

Hartwin Brandt

# Geschichte der römischen Kaiserzeit

Von Diokletian und Konstantin  
bis zum Ende der  
konstantinischen Dynastie (284–363)

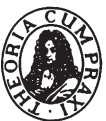

Akademie Verlag

Die Deutsche Bibliothek – CIP-Einheitsaufnahme

**Brandt, Hartwin:**

Geschichte der römischen Kaiserzeit : von Diokletian und  
Konstantin bis zum Ende der konstantinischen Dynastie (284–363) /

Hartwin Brandt. – Berlin : Akad. Verl., 1998

(Studienbücher Geschichte und Kultur der Alten Welt)

ISBN 3-05-003281-2

© Akademie Verlag GmbH, Berlin 1998

Der Akademie Verlag ist ein Unternehmen der R. Oldenbourg-Gruppe.

Das eingesetzte Papier ist alterungsbeständig nach DIN/ISO 9706.

Alle Rechte, insbesondere die der Übersetzung in andere Sprachen, vorbehalten. Kein Teil dieses Buches darf ohne schriftliche Genehmigung des Verlages in irgendeiner Form – durch Photokopie, Mikroverfilmung oder irgendein anderes Verfahren – reproduziert oder in eine von Maschinen, insbesondere von Datenverarbeitungsmaschinen, verwendbare Sprache übertragen oder übersetzt werden.

Einbandgestaltung: Günter Schorch, Schildow

Buchgestaltung und Satz: Hans Herschelmann, Berlin

Druck: WB-Druck, Rieden

Printed in the Federal Republic of Germany

---

## Vorwort der Herausgeber

Es ist paradox, daß auf dem Wege Deutschlands in ein geeintes Europa den gemeinsamen Wurzeln dieses Europas in seinem Bildungssystem immer weniger Aufmerksamkeit geschenkt wird. Dem erklärten politischen Willen, ein geeintes Europa zu schaffen, steht ein zielstrebigter Abbau des tragenden Geschichtsbildes und des Wissens um sein kulturelles Werden gegenüber. Damit werden aber gerade jene Bereiche im allgemeinen Bewußtsein abgebaut, die auf dem Weg der Einigung Europas das notwendige mentale, identitätsstiftende Fundament über die wirtschaftlichen Komponenten und ökonomischen Interessen hinaus zu geben vermögen; denn letztere besitzen durchaus ein Konfliktpotential für das gewollte Zusammenwachsen. Es ist bei der Entwicklung der schulischen Lehrpläne in den verschiedenen Bundesländern festzustellen, daß gerade das Wissen um jene Perioden abgebaut wurde, ja noch weiter reduziert werden soll, aus denen Europa konkret als Einheit zu begreifen ist. Gegenüber der Antike, dem Werden des Abendlandes in der Schwellenphase von Spätantike und Frühmittelalter und schließlich dem Mittelalter selbst wird genau jene Epoche in den Vordergrund gestellt, in der sich Europa durch Nationalismus, Imperialismus und wirtschaftliche Konkurrenz zu einem erbitterten Gegeneinander entwickelt hat. Geschichte in der Schule vermittelt keine europäische Perspektive, sondern wird zur nationalen Nabelschau. Dagegen werden die Phänomene zurückgedrängt, in denen sich eine völker-, sprachen- und kulturübergreifende Symbiose verwirklicht hatte, wie wir dies im Hellenismus, zu dem auch das republikanische Rom und der westliche Mittelmeerraum gehörten, und im Imperium Romanum vor Augen haben. Gerade hier sind Multikulturalität und Kulturationsprozesse, Innovation und Beharren sowie wirtschaftliche, kulturelle und soziale Interferenzen beispielhaft zu verfolgen, also die Sinnhaftigkeit des Phänomens, das wir mit dem Schlagwort Europa meist nur vage ansprechen, nachzuvollziehen. Daß es für diese Vergangenheiten unserer Gegenwart eine breite Nachfrage nach Information gibt, das zeigt nicht nur die umfangreiche Produktion von Sachbüchern, sondern auch das Interesse an Medienproduktionen zu Themen von Archäologie und Antike. Die

Folgen der skizzierten Entwicklung auf dem Feld der Schulbildung werden noch dadurch verstärkt, daß sich der Zugang zu den Zeugnissen des Altertums über die Quellsprachen immer mehr verengt. Dabei darf nicht übersehen werden, daß das Griechische für die „römische Welt“ als allgemein verbreitete und den Osten des Imperium Romanum prägende Sprache zu dem Gesamtphänomen gehört, ja den Zugang zu den Quellen für die aktuellsten Fragestellungen nach dem sozialen und wirtschaftlichen Alltag eröffnet, von seiner prägenden Kraft als Kirchensprache ganz abgesehen. Der nur auf die Gegenwart hin funktionalisierte schulische Unterricht kann die Bedürfnisse nach stabiler Orientierung und Identität nicht befriedigen, er macht gerade anfällig für Ideologien und ‚einfache Lösungen‘. Die Verengung im schulischen Unterricht wirkt in komplexer Weise auf die akademische Ausbildung zurück, in den fehlenden Vorkenntnissen der Studierenden ebenso wie in der Strukturierung des Studiums oder einer ‚Verschlankung‘ der Lehrausbildung. Fördernder schulischer Unterricht sowie qualifizierte, problemorientierte Medientätigkeit setzen aber Kompetenz voraus. Aus der fachlichen und methodischen Qualifikation erwachsen Autorität, eigenes Einsichtsvermögen und damit die Voraussetzungen für kreative Vermittlung von Inhalten. Die Fähigkeit zur Erklärung von komplexen, übergreifenden Phänomenen bedarf des eigenen vertieften Zuganges.

Die Reihe „Studienbücher Geschichte und Kultur der Alten Welt“ möchte zu einer Antwort auf die angesprochenen Probleme beitragen. Die einzelnen Bände sollen in der Breite wie in der Konzentration der gebotenen Inhalte ein fundiertes Informationsmedium und ein in die Vertiefung von Fragestellungen wie Methoden führendes Arbeitsinstrument darstellen. Sie sollen nicht nur auf den akademischen Unterricht und das Studium ausgerichtet sein, auch wenn dies eine wesentliche Zielsetzung bildet, sondern ebenso auf die Bereiche von Lehrerfortbildung, Unterrichtsvorbereitung oder Projektunterricht, auf die Nachbarwissenschaften und auf den breiten Kreis interessierter Leser. Die Bände der Reihe werden zum einen in einer chronologischen Gliederung einzelne Abschnitte der geschichtlichen Entwicklungen zum Gegenstand haben, zum anderen thematisch aufgebaut sein. Dabei soll besonders auf die Überwindung traditioneller Schematismen hingewiesen werden. Das inhaltliche Spektrum und die Vertiefung der Darstellung sind gegenüber bisherigen Quellsammlungen, auch solchen des angelsächsischen Raumes, entscheidend erweitert. Nicht die Vielzahl der vorgelegten Quellen, sondern deren exemplarischer Charakter und beispielhafte Erschließung stehen im Mittelpunkt. Darstellung, Kommentierung, Glossar und Bibliographie sollen die einzelnen Bände zu Arbeitsinstrumenten machen, die den Zugang zu Diskussionsstand und Verständnis der behandelten Phänomene bieten. Dabei sollen literarische wie nichtliterarische Textquellen, antike Bildmedien und archäologische Befunde gleichberechtigt

nebeneinandertreten. Abbildungen dienen nicht der Illustration, sondern stellen Quellen dar, die in Aussage wie Problematik erschlossen werden. Die Herausgeber hoffen, durch die neue Reihe eine Lücke in den Instrumenten zur Vermittlung vertieften Wissens und Verständnisses für das Altertum als Grundlage unserer europäisch geprägten Welt zu schließen und zu einem breiten, nicht auf die Zeitgeschichte verengten Geschichtsbild beizutragen. Daß die Textquellen dabei in einer auf ihre Begrifflichkeit hin geprüften Übersetzung geboten werden, soll nicht als Zugeständnis an den „Zeitgeist“ mißverstanden werden; die Kenntnis der Quellsprachen bleibt unverzichtbar. Es ist vielmehr das Ziel, den Zugang zu den Textquellen für die breiten Kreise zu öffnen, die in der universitären, schulischen und gesellschaftlichen Allgemeinheit nicht über Kenntnisse der klassischen europäischen oder gar der altorientalischen Sprachen verfügen, ebenso für jene Studierenden, die sich ihre Kenntnisse erst an der Universität aneignen und nicht mehr über eine breite schulische Textlektüre verfügen. Die antike Begrifflichkeit soll durch die Übersetzung nicht ausgeklammert, sondern als quellsprachlicher Schlüssel herausgestellt werden. So sind zugleich die begriffsgeschichtlichen Vorgaben der Terminologien zu erhellen, die wir in allen Bereichen benutzen und die sich auch in Neuschöpfungen aus der antiken Sprachlichkeit ableiten. Die Tatsache, daß die lateinische Begrifflichkeit den gesamten romanischen Raum prägt, ist dabei sicher eher im Bewußtsein als ihre Präsenz auch im Englischen. Daß Sprache und Begriffe unser Denken wie die mentalen Strukturen unserer Wahrnehmung formen, ist dabei ins Gedächtnis zu rufen. Die Herausgeber hoffen, daß die Reihe „Studienbücher Geschichte und Kultur der Alten Welt“ durch die Breite der Themen und die Vielfalt der vorgestellten Quellen die antike Welt in dem Reichtum ihrer Aspekte, in der Pluralität ihrer Lebenswelten und in der Modernität vieler Fragestellungen bewußt werden läßt. Die Welt der Antike ist in der Gegenwart stets präsent; sie hat aus der griechischen Welt den Gedanken einer politischen Partizipation des Bürgers, die von einem Gemeinwesen der Bürger getragene politische und soziale Ordnung eingebracht, aus dem Imperium Romanum die Ordnung auf der Grundlage des Bürgerrechts und der in den größeren politischen Verband integrierten kommunalen und regionalen Selbstverwaltungseinheiten. Ohne sie hätte der mehr als ‚schlanke Staat‘ des Imperium Romanum nie funktioniert, nie die tragende Akzeptanz gewonnen, ja nie in seiner Multi-Ethnizität und Multikulturalität so dauerhaft existiert. Dabei ist gerade diese Existenz des Imperium Romanum die Voraussetzung für die Ausbreitung des Christentums, für die Ausbildung des Abendlandes und der Moderne, ja für die Formung des Begriffes „Europa“ gewesen.

---

# Vorwort

Dieses Buch wurde zum größten Teil im Wintersemester 1996/97 in Rom geschrieben, wo ich während eines Forschungsfreisemesters die Reichtümer der einzigartigen Bibliothek des Deutschen Archäologischen Instituts nutzen durfte.

Die Anregung zu dem Unternehmen verdanke ich Herrn Kollegen K. M. Girardet (Saarbrücken), der mich für die neue Reihe der Studienbücher gewann und dem ich für zahlreiche Anregungen und Hinweise im Zuge eines kollegialen und fruchtbaren Austausches zu Dank verpflichtet bin. Insbesondere habe ich von der Lektüre seiner (1998 erscheinenden) Studie über "Die Konstantinische Wende und ihre Bedeutung für das Reich" profitiert, die er mir im Manuskript großzügigerweise überlassen hat.

Frau Sylvia Weigel hat mit ebenso großer Geduld wie Zuverlässigkeit mehrere Versionen des gesamten Textes geschrieben, den Christof Schuler (Tübingen) in Teilen gelesen und durch hilfreiche Vorschläge verbessert hat.

Für die Anfertigung und Übersendung von Abbildungsvorlagen danke ich der Fotoabteilung des DAI in Rom und vor allem Andreas Thomsen (Tübingen), und, last but not least, danke ich dem Akademie Verlag und Herrn Manfred Karras für die angenehme Zusammenarbeit.

Chemnitz, im Dezember 1997

Hartwin Brandt

---

# Inhaltsverzeichnis

|                                                                                   |    |
|-----------------------------------------------------------------------------------|----|
| Abkürzungsverzeichnis .....                                                       | 13 |
| <b>I. Darstellung</b>                                                             |    |
| Einführung: Altes und Neues – Die Spätantike .....                                | 17 |
| 1. Diokletian und die Tetrarchie (284–305): Reform und<br>Erneuerung .....        | 19 |
| 1.1 Das neue System der Tetrarchie .....                                          | 20 |
| 1.2 Reformen in Wirtschaft und Verwaltung .....                                   | 22 |
| 1.3 Innovation und Restauration: Die Religionspolitik .....                       | 25 |
| 2. Konstantin der Große (306–337): Monarchisierung und<br>Christianisierung ..... | 27 |
| 2.1 Die Rückkehr zur Monarchie .....                                              | 27 |
| 2.2 Rom und Barbaren: Eine neue Strategie? .....                                  | 28 |
| 2.3 Eine neue Hauptstadt? Konstantinopel .....                                    | 30 |
| 2.4 Eine neue Währungs politik? Der „aureus solidus“ .....                        | 31 |
| 2.5 Der neue Kurs (I): Die ‚konstantinische Wende‘ .....                          | 32 |
| 2.6 Der neue Kurs (II): Christen, Häretiker, Heiden<br>und Juden .....            | 34 |
| 3. Die Söhne Konstantins (337–361): Krisen und Konflikte .....                    | 39 |
| 3.1 Die Krise des Kaisertums: Nachfolgekämpfe<br>und Usurpationen .....           | 39 |
| 3.2 Innere Konflikte: Staat, Kirche und Gesellschaft .....                        | 41 |
| 3.3 Der permanente Konflikt: Rom und Persien .....                                | 44 |
| 4. Julian (361–363): Das Scheitern der Restaurationspolitik .....                 | 49 |
| 4.1 Politische Restauration: Städte und Steuern .....                             | 49 |
| 4.2 Religiöse Restauration .....                                                  | 52 |

## II. Materialteil

|      |                                                              |     |
|------|--------------------------------------------------------------|-----|
| 1.   | Diokletian und die Tetrarchie (284–305) .....                | 57  |
| 1.1: | Das neue System der Tetrarchie .....                         | 57  |
|      | M 1: Porträt Diokletians (?) .....                           | 57  |
|      | M 2: Die Genese der Tetrarchie .....                         | 59  |
|      | M 3: Das Fünfsäulendenkmal auf dem Forum Romanum ...         | 64  |
|      | M 4: Die Maxentius-Basilika in Rom .....                     | 69  |
|      | M 5: Die Diokletiansresidenz in Spalato .....                | 73  |
| 1.2: | Reformen in Wirtschaft und Verwaltung .....                  | 75  |
|      | M 6: Die Währungsreform vom 1. 9. 301 .....                  | 75  |
|      | M 7: Das Höchstpreisedikt .....                              | 78  |
|      | M 8: Steuer- und Verwaltungsreformen .....                   | 86  |
| 1.3: | Innovation und Restauration: Die Religionspolitik .....      | 92  |
|      | M 9: Das Ehedikt der Tetrarchen von 295 .....                | 92  |
|      | M 10: Iovius und Herculus .....                              | 93  |
|      | M 11: Die Christenverfolgung .....                           | 98  |
| 2.   | Konstantin der Große (306–337) .....                         | 103 |
| 2.1: | Die Rückkehr zur Monarchie .....                             | 103 |
|      | M 12: Porträt Konstantins des Großen .....                   | 103 |
|      | M 13: Die Schlacht bei der Milvischen Brücke .....           | 105 |
| 2.2: | Rom und Barbaren: Eine neue Strategie? .....                 | 109 |
|      | M 14: Constantinus Maximus Augustus .....                    | 109 |
|      | M 15: Der Gotenvertrag von 332 .....                         | 112 |
| 2.3: | Eine neue Hauptstadt? Konstantinopel .....                   | 118 |
|      | M 16: Plan von Konstantinopel .....                          | 118 |
| 2.4: | Eine neue Währungspolitik? Der „aureus solidus“ .....        | 123 |
|      | M 17: Der goldgierige Konstantin .....                       | 123 |
|      | M 18: Ein „solidus“ Konstantins .....                        | 126 |
| 2.5: | Der neue Kurs (I): Die ‚konstantinische Wende‘ .....         | 128 |
|      | M 19: Die ‚christliche Vision‘ Konstantins .....             | 128 |
|      | M 20: Der Konstantinsbogen in Rom .....                      | 130 |
|      | M 21: Die Inschriften des Konstantinsbogens .....            | 133 |
|      | M 22: Das Silbermedaillon von Ticinum .....                  | 135 |
|      | M 23: Die Laterans-Basilika in Rom .....                     | 137 |
| 2.6  | Der neue Kurs (II): Christen, Häretiker, Heiden und Juden .. | 140 |
|      | M 24: Das Edikt des Galerius vom Jahre 311 .....             | 140 |
|      | M 25: Der christliche Kaiser und die Juden .....             | 142 |

|      |                                                                     |     |
|------|---------------------------------------------------------------------|-----|
| 3.   | Die Söhne Konstantins (337–361) .....                               | 147 |
| 3.1: | Die Krise des Kaisertums: Nachfolgekämpfe<br>und Usurpationen ..... | 147 |
|      | M 26: Die Nachfolgeordnung Konstantins .....                        | 147 |
|      | M 27: Ein „solidus“ des Magnentius .....                            | 150 |
| 3.2: | Innere Konflikte: Staat und Gesellschaft .....                      | 153 |
|      | M 28: Der Rombesuch Constantius' II. im Jahr 357 .....              | 153 |
|      | M 29: Gesetz zur Steuerpflicht christlicher Kleriker .....          | 158 |
| 3.3: | Der permanente Konflikt: Rom und Persien .....                      | 161 |
|      | M 30: Die Belagerung von Nisibis im Jahr 350 .....                  | 161 |
| 4.   | Julian (361–363) .....                                              | 165 |
| 4.1: | Politische Restauration: Städte und Steuern .....                   | 165 |
|      | M 31: Der Kaiser ist tot – es lebe der Kaiser! .....                | 165 |
|      | M 32: Der neue Augustus .....                                       | 169 |
|      | M 33: Ein Standbild Julians (?) .....                               | 171 |
| 4.2: | Religiöse Restauration .....                                        | 174 |
|      | M 34: Das Rhetoren- und Grammatikergesetz .....                     | 174 |
|      | M 35: Totenklage: Libanios über Julian .....                        | 180 |
|      | M 36: Kontorniat mit Bildnis Julians .....                          | 185 |
|      | M 37: Diptychon: Die Apotheose Julians(?) .....                     | 188 |

### III. Anhang

|    |                                                     |     |
|----|-----------------------------------------------------|-----|
| 1. | Verzeichnis der abgekürzt zitierten Literatur ..... | 193 |
| 2. | Zeittafel .....                                     | 199 |
| 3. | Glossar .....                                       | 201 |
| 4. | Abbildungsverzeichnis .....                         | 207 |
| 5. | Register .....                                      | 209 |



---

# Abkürzungsverzeichnis

|         |                                                                                        |
|---------|----------------------------------------------------------------------------------------|
| AA      | = Archäologischer Anzeiger                                                             |
| AE      | = Année Épigraphique                                                                   |
| AJA     | = American Journal of Archaeology                                                      |
| AncSoc  | = Ancient Society                                                                      |
| ANSMusN | = The American Numismatic Society Museum Notes                                         |
| AW      | = Antike Welt                                                                          |
| AnTard  | = Antiquité Tardive                                                                    |
| BHAC    | = Bonner Historia Augusta-Colloquium                                                   |
| BJ      | = Bonner Jahrbücher                                                                    |
| CIL     | = Corpus Inscriptionum Latinarum                                                       |
| CTh     | = Codex Theodosianus                                                                   |
| FHG     | = Fragmenta Historicorum Graecorum                                                     |
| GGA     | = Göttingische Gelehrte Anzeigen                                                       |
| GWU     | = Geschichte in Wissenschaft und Unterricht                                            |
| HZ      | = Historische Zeitschrift                                                              |
| InvLuc  | = Invigilata Lucernis                                                                  |
| JbAC    | = Jahrbuch für Antike und Christentum                                                  |
| JNG     | = Jahrbuch für Numismatik und Geldgeschichte                                           |
| ILS     | = Inscriptiones Latinae Selectae                                                       |
| JRS     | = Journal of Roman Studies                                                             |
| LNV     | = Litterae Numismatae Vindobonenses                                                    |
| MGH, AA | = Monumenta Germaniae Historica, Auctores antiquissimi                                 |
| PLRE    | = Prosopography of the Later Roman Empire                                              |
| RAC     | = Reallexikon für Antike und Christentum                                               |
| RE      | = Realencyklopaedie der classischen Altertumswissenschaft                              |
| RIC     | = Roman Imperial Coinage                                                               |
| RM      | = Mitteilungen des Deutschen Archäologischen Instituts.<br>Abtlg. Rom                  |
| RQ      | = Römische Quartalsschrift für christliche Altertumskunde<br>und für Kirchengeschichte |
| SM      | = Schweizer Münzblätter                                                                |

|     |                                              |
|-----|----------------------------------------------|
| TRE | = Theologische Realenzyklopädie              |
| ZPE | = Zeitschrift für Papyrologie und Epigraphik |

---

# I. Darstellung



---

## Einführung: Altes und Neues – Die Spätantike

Schon immer hat man – in der analysierenden Rückschau – gesehen, daß das Jahr 284 einen bedeutsamen Einschnitt in der römischen Geschichte markierte: Mit dem Herrschaftsantritt Diokletians am 20. 11. 284 begann die Spätantike, begann etwas Neues – aber an der historischen Interpretation dieser Neuerungen scheiden sich bis heute die Geister. Die lange Jahrzehnte geradezu kanonische Deutung geht auf Theodor Mommsen zurück: Mit Diokletian sei der Prinzipat durch den Dominat abgelöst worden, in welchem der Kaiser als Herr („dominus“) weit über den Aristokraten sowie über der kaiserzeitlichen Rechtsordnung gestanden und gar eine gottähnliche Stellung eingenommen habe. Diese Auffassung kann inzwischen als überholt betrachtet werden,<sup>1</sup> gleichwohl diskutiert man weiterhin, ob und inwiefern Diokletian und seine Mitherrscher eine überlegte Neuformierung der Kaiserherrschaft angestrebt haben und wie ihre Reformen in Staat, Wirtschaft und Gesellschaft zu beurteilen sind.

Gewandelt hat sich auch das Bild der Spätantike insgesamt. Galt diese früher als lange Verfallszeit des Altertums bzw. als Ouvertüre des europäisch-byzantinischen Mittelalters, so besteht heute kein Zweifel mehr an dem genuin antiken Charakter des spätrömischen Reiches, das im 4. Jahrhundert sogar eine neue Blüte erlebte.<sup>2</sup> Die wichtigsten Elemente der geschichtlichen Entwicklungen und Wandlungen der Zeit zwischen 284 und 363 werden in dem vorliegenden Band anhand von literarischen Quellen, Dokumenten und Denkmälern zur Sprache kommen, darunter insbesondere auch die religiöse Entwicklung, bildet doch der Konflikt zwischen Christentum und Heidentum ein, wenn nicht gar *das* beherrschende Thema des 4. Jahrhunderts. Insofern bietet der chronologische Endpunkt des Bandes, das Jahr 363, in zweifacher Hinsicht eine sinnvolle Zäsur: Mit dem Tod des Kaisers Julian endete nicht nur die konstantinische Dynastie, sondern zugleich scheiterte der letzte umfassende Versuch, der fortschreitenden Christianisierung

---

1 Bleicken (1978).

2 Vgl. Demandt (1989) XIIIff.; ders., *Der Fall Roms*, 1984.

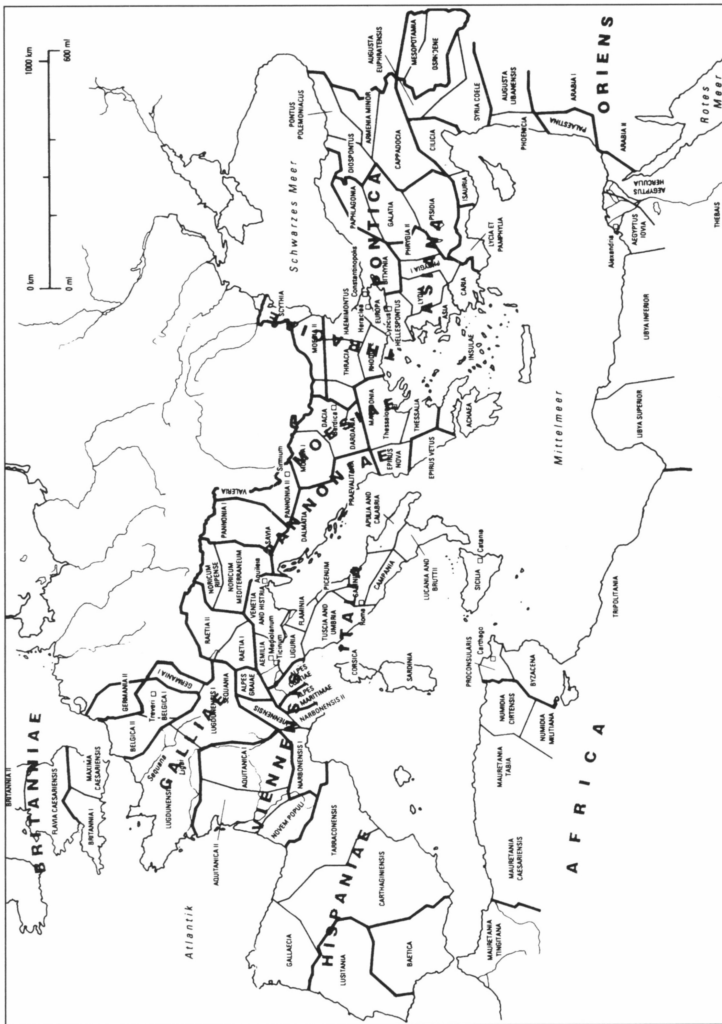

Abb. 1: Das römische Reich in der Spätantike

des römischen Reiches Einheit zu gebieten – der vermeintlich „letzte Kampf des Heidentums“ in Rom (392–394) unter dem Usurpator Eugenius<sup>3</sup> war demgegenüber nur ein schwaches Echo der bereits unter Julian gescheiterten religiösen Restauration.

3 Vgl. T. Grünwald, Der letzte Kampf des Heidentums in Rom?, Historia 41 1992, 462–487 (mit ausführlicher Literatur zu diesem Schlagwort in 462 Anm. 1).

---

# 1. Diokletian und die Tetrarchie (284–305): Reform und Erneuerung

Der Herrschaftsantritt<sup>4</sup> Diokletians am 20. 11. 284 in Nikomedeia ließ zunächst nur ein weiteres Kapitel in der schon langen Geschichte von Usurpationen und Thronwechseln des krisenhaften 3. Jahrhunderts erwarten: Der aus einfachen Verhältnissen stammende, in Dalmatien beheimatete und eine rein militärische Karriere aufweisende Offizier C. Valerius Diocles wurde von den römischen Truppen zum Kaiser ausgerufen, und seine erste ‚Amtshandlung‘ bestand in der sofortigen Ermordung des in der Heeresversammlung neben ihm postierten Prätorianerpräfekten und potentiellen Konkurrenten Aper. Trotz dieser mit Blick auf das gesamte 3. Jahrhundert geradezu konventionellen Art der Amtsübernahme, die erst endgültig durch den Tod des amtierenden Kaisers Carinus (August/September 285) und die nachfolgende Anerkennung durch den Senat abgerundet wurde, zeigte sich bald, daß der neue, sich nun M. Aurelius (C.) Valerius Diocletianus nennende Kaiser weiterreichende Vorstellungen entwickelte, die auf eine umfassende Reformierung von Herrschaft, Staat und Gesellschaft abzielten. Fast alle Einzelelemente dieses Reformwerks werden, genauso wie die (primär aus fragmentarischen Inschriften, Papyri sowie Münzmissionen zu rekonstruierende) Abfolge wichtiger historischer Begebenheiten, in der althistorischen Forschung sehr lebhaft diskutiert. Umstritten ist vor allem die Frage, ob Diokletian bereits sehr früh die Formierung einer Mehrkaiserherrschaft auf neuer Basis angestrebt hat oder durch den Zwang der Ereignisse zu einer schrittweisen Aufteilung der kaiserlichen Kompetenzen auf mehrere Schultern gezwungen war.

---

<sup>4</sup> Ich folge hier und im weiteren vornehmlich den Auffassungen von F. Kolb (1987) 10ff.; ders. (1995) 21–31; zu den abweichenden Positionen vor allem von T. D. Barnes siehe nur Kolb, ebd., und Gnomon 60, 1988, 45ff.

## 1.1 Das neue System der Tetrarchie

Bereits Ende 285, wahrscheinlich am 13. 12., erkor Diokletian den nahezu gleichaltrigen, ebenfalls von niedriger Herkunft durch eine militärische Laufbahn aufgestiegenen Landsmann Maximianus zum Caesar, offenbar in der festen Absicht, ihn schon bald – nach einer Bewährungszeit – zum Augustus zu erheben.<sup>5</sup> Maximian erfüllte die in ihn gesetzten Hoffnungen: Er besiegte die aufständischen Bagauden in Gallien und avancierte im Frühjahr 286 – vielleicht am 1. Mai – zum Augustus. Wie wohldurchdacht Diokletian vorging, zeigen die Modalitäten der Entstehung dieser Zweikaiserherrschaft (Dyarchie): Maximian nahm das Gentilnomen Diokletians an und hieß fortan M. Aurelius Valerius Maximianus. Beide Augusti erhielten überdies zwei Beinamen, die künftig in Inschriften, auf Münzen und in offiziellen Festreden (Panegyrici) propagandistisch genutzt wurden: Diokletian erhob als „Iovius“ den Anspruch, Abkömmling Jupiters zu sein, und Maximian leitete sich als „Herculius“ von Hercules her. Es entstand somit eine theokratisch untermauerte Zweikaiserherrschaft, die sich einerseits durch eine aufwendige und raffinierte Herrschaftsideologie um Akzeptanz beim Volk und vor allem bei den Soldaten bemühte und andererseits von vornherein potentiellen Usurpatoren jede Legitimität bestreiten wollte.<sup>6</sup>

Wollte Diokletian langfristige Stabilität der Kaiserherrschaft anstreben, mußte er vor allem für eine Lösung des stets prekären Nachfolgeproblems Sorge tragen. In diesem Punkt verfiel er auf eine wahrhaft originelle Idee: Im Frühjahr 293<sup>7</sup> wurden zwei ebenfalls dem Balkanraum entstammende, mit den beiden Augusti nahezu gleichaltrige Militärs – Constantius I. Chlorus und Galerius – zu Caesares ernannt, als Söhne („filii“) von den Augusti adoptiert und zugleich als „Iovius“ bzw. „Herculius“ in die göttliche Herrscherfamilie („domus divina“) aufgenommen. Das revolutionäre Moment dieser Regelung besteht darin, daß hiermit der leibliche Sohn Maximians, Maxentius, von der Nachfolge ausgeschlossen wurde.

Spätantike Autoren und eine Reihe von modernen Gelehrten motivieren diese Erweiterung der Dyarchie zur Tetrarchie mit militärischen und politischen Problemen, derer die beiden Augusti allein nicht mehr Herr zu werden vermochten, aber exakte chronologische Untersuchungen<sup>8</sup> lassen dies zweifelhaft erscheinen. Zwar mußten (wahrscheinlich) zwischen Herbst 296

5 Dafür könnte das auffällige Fehlen der Münzen für den Caesar Maximian sprechen – anscheinend hatte Diokletian die Aufwertung Maximians zum Augustus und Bruder („frater“) bereits ins Auge gefaßt (Kolb 1987, 46f.).

6 Vgl. vor allem Kolb (1987) 88–114 und unten M 10.

7 Die exakten Daten sind nicht gesichert, vgl. zuletzt Kolb (1995) 23.

8 Kolb (1988a) 105–125.; ders. (1988b) 325–343; ders. (1987) 68ff.

und Sommer 298 Aufstände in Ägypten (gegen Domitius Domitianus und Aurelius Achilleus) bekämpft und gegen den sassanidischen Herrscher Narses Krieg geführt sowie das 286/87 von dem Usurpator Carausius beherrschte Britannien zurückgewonnen werden,<sup>9</sup> aber mit diesen Begebenheiten läßt sich nicht plausibel die Erhebung der Caesares im Jahre 293 begründen. Das ausschlaggebende Motiv dürfte daher in der Stabilisierung der neuformierten Kaiserherrschaft und der längerfristig geregelten Nachfolge liegen, und dieser Eindruck wird bestätigt durch die erkennbare Vervollkommenung des tetrarchischen Systems zwischen 293 und 303.<sup>10</sup> Gezielte Manipulationen bei der offiziellen Zählung der Herrschaftsjahre von Diokletian und Maximian ermöglichten die gemeinsame Feier ihrer Vicennalia (des 20-jährigen Regierungsjubiläums) und mündeten ein in eine weitere revolutionäre, am 1. 5. 305 realisierte Neuerung des tetrarchischen Systems: die freiwillige Abdankung der Augusti. Entgegen tendenziösen Darstellungen etwa des christlichen Historikers Laktanz<sup>11</sup> scheint der Rücktritt vom Kaiseramt länger geplant und – zumindest von seiten Diokletians – freiwillig erfolgt zu sein, worauf unter anderem die Baugeschichte des Diokletianspalastes in Spalato deutet (M 5). Jedenfalls wurden anlässlich der Etablierung der zweiten Tetrarchie am 1. 5. 305 Münzen ausgegeben, auf denen die Legenden mit der Nennung von Gelübden („vota“) aufgrund von Regierungsjubiläen – VOT X (für die Caesares) und VOT XX (für die Augusti)<sup>12</sup> – eine „dezimale Symmetrie“ (F. Kolb) der Herrschaftszeiten fingieren. Offensichtlich strebte Diokletian eine dauerhafte Fortsetzung des von ihm geschaffenen Systems an, indem zwei Augusti jeweils nach zwanzig Jahren abtreten und die bereits zehn Jahre amtierenden Caesares als neue Augusti nachrücken sollten, um ihrerseits neue Caesares als präsumtive Augusti zu ernennen. Nur am 1. Mai 305 hat dieses wahrlich ingeniose Modell reibungslos funktioniert: Die Caesares Constantius I. Chlorus und Galerius avancierten zu Augusti, und zwei weitere, ebenfalls aus dem Balkanraum stammende Militärs, Severus und Maximinus Daia, wurden zu Caesares ernannt – die leiblichen Söhne der Augusti gingen leer aus.

9 Vgl. die Ereignistabelle bei Kolb (1995) 26f.

10 Siehe dazu Kolb (1987) 115–127.

11 Lact. de mort. pers. 18, 1–7: Er behauptet, Galerius habe Diokletian zur Abdankung gezwungen.

12 Kolb (1987) 126 (mit Nachweisen und Münzabbildungen).

## 1.2 Reformen in Wirtschaft und Verwaltung

Die tetrarchischen Reformbestrebungen auf den Feldern der Währungs- und Steuerpolitik sowie im Verwaltungswesen setzen offenbar ebenfalls schon früh in den 290er Jahren ein und unterstreichen den Eindruck einer tatsächlich längerfristig konzipierten und keineswegs kurzatmigen, nur ad hoc reagierenden Politik. Energische Maßnahmen ergriffen die Tetrarchen zur Behebung der im 3. Jahrhundert stetig gewachsenen Münzprobleme, die zur Verminderung des Metallgehalts sowie zu Wertverfall und Inflation geführt hatten.<sup>13</sup> Es wurde (vielleicht schon seit 292/93) eine reichsweite Vereinheitlichung der Münzherstellung mit zentral gelenkten Reichsmünzstätten geschaffen, die Sesterzprägung aufgegeben, und als neue, wichtigste Gebrauchsmünze für die ‚kleinen Leute‘ wurde eine mit Silber überzogene Bronzemünze, der Follis, eingeführt. Deutlich erkennbar ist jedoch bereits die Tendenz, vor allem eine stabile Gold- („aureus solidus“) und Silberwährung („argenteus“) zu etablieren<sup>14</sup> – mit diesen zukunftsweisenden Maßnahmen, die vor allem eine weit über die Spätantike hinaus solide Goldwährung begründeten, gelang eine zumindest temporäre Beruhigung der Währungsturbulenzen.

Eine vor wenigen Jahrzehnten gefundene Inschrift aus Kleinasien (M 6) vermittelt uns Einblicke in die Einzelheiten der letzten großen Etappe dieser Politik, der Währungsreform vom 1. 9. 301. Deren Hauptzweck bestand augenscheinlich in der Schonung der staatlichen Silberressourcen, denn allein die Silbernominale und versilberten Bronzen wurden durch dieses Edikt in ihrem Wert verdoppelt, worauf der Markt natürlich mit entsprechenden Preissteigerungen reagieren würde. Daher erließen Diokletian und seine Kollegen nur wenig später – noch im Jahre 301 – das berühmte Preisedikt (M 7) mit einer umfänglichen Liste von Höchstpreisen für Güter und Dienstleistungen. Zwar erwies sich diese Preisbindungspolitik letztlich in dem riesigen Imperium Romanum als nicht konsequent durchsetzbar,<sup>15</sup> gleichwohl zeugen die genannten Inschriften von einem für die damalige Zeit bemerkenswerten Niveau wirtschaftspolitischer Überlegungen und Strategien.

13 M. F. Hendy, *Mint and Fiscal Administration under Diocletian, his Colleagues and his Successors*, JRS 62, 1972, 75–82; P. Bruun, *The Successive Monetary Reforms of Diocletian*, ANS MusN 24, 1979, 129–148.

14 Jahn (1975) 91–105; Brandt (1988) 26ff.

15 Immerhin kommt jüngst H. Böhne (1994) 473–483 zu dem Ergebnis, daß Diokletians Geldpolitik nicht als gescheitert anzusehen sei.

Nicht weniger innovativ agierten die Tetrarchen auf dem Sektor der Steuerpolitik. In den Einzelheiten bis heute nicht definitiv geklärt<sup>16</sup> und etwa von dem christlichen Historiker Laktanz als Instrument zur Vermehrung der Steuerlasten gebrandmarkt (M 8), dürfte das Hauptziel der neuen, vielleicht schon seit 287 auf den Weg gebrachten<sup>17</sup> Maßnahmen doch darin bestanden haben, auch hinsichtlich der Steuererhebung ein reichsweit einheitliches System zu kreieren und dessen Rationalität und Effizienz zu garantieren. Die wichtigste, in Naturalien oder (in Folge der sog. Adäration)<sup>18</sup> in Geldform zu zahlende Grundsteuer („*annona*“) wurde aufgrund eines im gesamten Imperium praktizierten Veranlagungsprinzips erhoben, das sowohl die verfügbaren Arbeitskräfte samt Viehbestand („*capita*“) als auch die nach Produkten differenzierte Anbaufläche („*iugera*“) berücksichtigte. Alle fünf Jahre sollte eine neue Bemessung („*indictio*“) der Steuerpflicht vorgenommen werden; seit Konstantin erfolgte die Indiktion alle fünfzehn Jahre und blieb noch im Mittelalter als Element der Datierung in Kraft, als dieses Steuersystem längst nicht mehr existierte.

Das in zahlreichen Gesetzen der spätantiken Codices behandelte System der „*capitatio-iugatio*“ (vgl. M 8) diente natürlich insbesondere der Gewährleistung des staatlichen Budgets, aus dem als gewiß größter Posten die Ausgaben für die Heeresversorgung und die zivile Administration bestritten werden mußten. Letztere wurde einerseits durch die Mehrzahl der Kaiser aufgebläht, die alle über eine eigene, mobile Hofverwaltung („*comitatus*“) verfügten, andererseits durch die von Diokletian initiierte Reorganisation der Provinzverwaltung, die zu einer Verkleinerung und annähernden Verdoppelung auf fast 100 Provinzen noch unter den Tetrarchen führte. Als neue Zwischeninstanz zwischen den Provinzen und der Reichszentrale fungierten – vielleicht bereits seit diokletianischer, möglicherweise aber auch erst seit konstantinischer Zeit<sup>19</sup> – nun (später von der christlichen Kirche als Organisationseinheit übernommene) zwölf Diözesen, denen „*vicarii*“ vorstanden.

16 Siehe zuletzt Carrié (1994).

17 So Carrié, ebd. 33–64.

18 Vgl. dazu vor allem K. L. Noethlichs, Spätantike Wirtschaftspolitik und Adäration, *Historia* 34, 1985, 102–116; Brandt (1988) 61ff.

19 Gegen die traditionelle Meinung, die bereits Diokletian diese Maßnahmen zuschreibt, wendet sich jetzt Migl (1994).

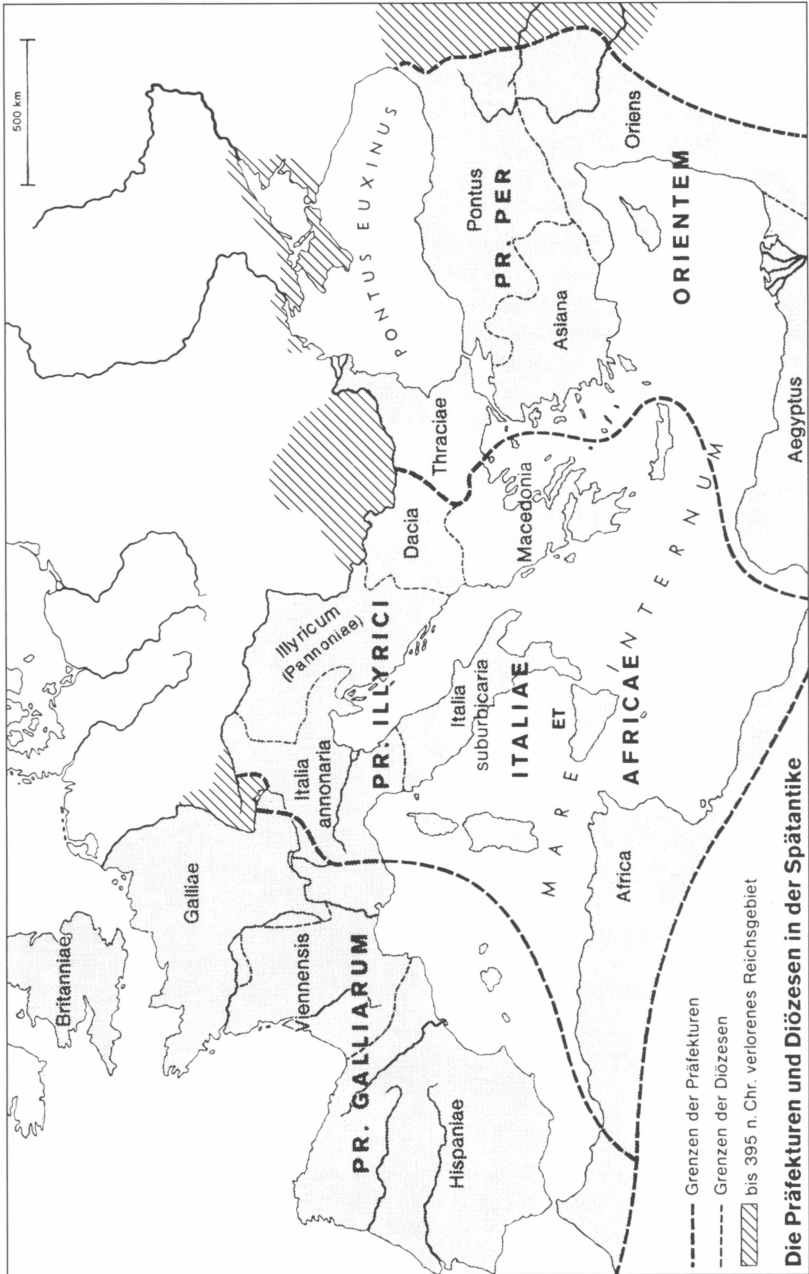

Abb. 2: Die Präfecturen und Diözesen in der Spätantike

Mit dem ebenfalls neugeordneten und auf vielleicht ca. 400.000 Mann angewachsenen Heer<sup>20</sup> gelang den Tetrarchen weitgehend die Sicherung der territorialen Integrität des Reiches. Ohne daß eine faktische Reichsteilung stattgefunden hätte, kristallisierten sich dennoch spezifische Kompetenz- und Operationsbezirke der einzelnen Tetrarchen heraus:<sup>21</sup> Diokletian agierte primär im gesamten Ostreich und war an militärischen und diplomatischen Aktionen gegen die Perser, in Syrien und im aufstandsgeplagten Ägypten beteiligt. Der vor allem für Griechenland und den Balkan zuständige Galerius führte im Donauraum Kriege gegen Sarmaten, Goten, Markomannen und Karpen und war maßgeblich an der Beendigung des Perserkrieges (298) beteiligt. Constantius I. Chlorus hatte den prekären nordwestlichen Raum (Gallien und Britannien) zu befrieden, während der zweite Augustus, Maximian, den verbleibenden größeren Westteil des Imperium kontrollierte und nach seinen früheren Erfolgen in Gallien (oben Seite 20) auch in Spanien und Nordafrika (296–298) erfolgreich gegen rebellierende Stämme operierte. Wahrscheinlich im Frühjahr 298<sup>22</sup> konnte daher der Festredner Eumenius in Autun das Bild eines befriedeten Erdkreises entwerfen.<sup>23</sup> Die äußere wie innere Stabilität hing freilich vom Bestand einer allgemein akzeptierten und funktionierenden Herrschaft der Kaiser ab. Da diese, wie gesehen, nicht zuletzt auf einer sakralen, an Jupiter und Herkules ausgerichteten Ideologie beruhte, konnten die Tetrarchen religiöse Bewegungen, welche die Gültigkeit und den Wert der altrömischen Religion in Zweifel zogen, nicht tolerieren.

### 1.3 Innovation und Restauration: Die Religionspolitik

Mit der am 23. Februar 303 begonnenen Christenverfolgung zogen die Tetrarchen die Konsequenz aus ihrem Anspruch, als Gottesabkömmlinge<sup>24</sup> die Welt zu regieren – die christliche Religion mit ihrem Absolutheitsanspruch und ihrer aggressiven Ablehnung der altheidnischen Kulte sollte beseitigt

20 Vgl. Joh. Lydos (6. Jh. n. Chr.) *de mens.* I 27 und M. Clauss, Artikel Heerwesen, *RAC* 13, 1986, 1009.

21 Die außenpolitischen und militärgeschichtlichen Ereignisse bietet in geraffter Form vor allem Eutrop. 9, 20–25 (vgl. M 2).

22 So F. Kolb (1988a) 112ff; ders. (1995) 23f.

23 Pan. Lat. 9(5)21, 1–3.

24 Eine Inschrift (ILS 629) ist den Kaisern als „den von Göttern Geschaffenen und Erzeugern von Göttern“ („*diis genitis et deorum creatoribus*“) gewidmet! Vgl. unten M 10.

werden.<sup>25</sup> Der innovativen Iovius-Herculius-Ideologie entsprach folglich das restaurative Bemühen um die uneingeschränkte Wiederherstellung der Gültigkeit altrömischer Kulttraditionen.<sup>26</sup> Auch diese Politik entsprang offenbar längerfristigen Überlegungen Diokletians und ist nicht mit Laktanz (de mort. pers. 10–11) auf den vermeintlich alleinigen Initiator der Christenverfolgung, Galerius, zurückzuführen. So proklamierte schon das 295 erlassene Ehedikt (M 9) die unabdingbare Notwendigkeit der Ehrfurcht gegenüber den römischen Göttern, und das gegen eine religiöse Sektenbewegung gerichtete, vielleicht 297 zu datierende und in der Forschung heftig diskutierte Manichäeredikt<sup>27</sup> unterstreicht, daß sich Diokletian der hochpolitischen Gefahren religiösen Dissenses bewußt war.

Insofern bildet die Christenverfolgung durchaus einen Höhe- und Endpunkt einer religionspolitischen Strategie. Der Zeitpunkt war klug gewählt und symbolträchtig: Der 23. Februar, der Tag, an dem, wie jüngst K. H. Schwarte durch einen detaillierten Textvergleich zwischen Laktanz und Eusebius hat zeigen können,<sup>28</sup> das erste und einzige Verfolgungsedikt ausgefertigt wurde, fiel auf das dem Jupiter heilige Fest der Terminalia. Christliche Kirchen und Schriften sollten zerstört und ein allgemeines (natürlich vor allem gegen christliche Kleriker gerichtetes) Opfergebot befolgt werden. Weitere Durchführungsbestimmungen offenbarten den rücksichtslosen Verfolgungswillen Diokletians: „Das diokletianische Christengesetz bot dem Christen, der einmal in das Räderwerk der Verfolgungsmaschinerie geraten war, nur die Alternative von Tod oder manifester Apostasie.“<sup>29</sup> Ihr Ziel hat die blutig realisierte Politik der Tetrarchen nicht erreicht, mit dem Toleranzedikt des Galerius von 311 (M 24) wurde sie denn auch offiziell eingestellt. Gleichwohl hat sie lange in das 4. Jahrhundert hineingewirkt und innerkirchliche Konflikte wie etwa den nordafrikanischen Donatistenstreit heraufbeschworen, da nach dem Ende der Unterdrückung unter den Christen Verdächtigungen und Vorwürfe wegen (vermeintlichen oder tatsächlichen) Abfalls vom wahren Christenglauben in der Verfolgungszeit erhoben wurden.

25 Vgl. dazu F. Kolb, *L'ideologia tetrarchica e la politica religiosa di Diocleziano*, in: G. Bonamente/F. Fusco (Hgg.), *I Cristiani e l'impero nel IV secolo*, 1988, 17–44.

26 Schwarte (1994) 203–240.

27 Zum aktuellen Diskussionsstand siehe zuletzt Kolb (1995) 27ff.

28 Schwarte (1994).

29 Schwarte (1994) 232.

---

## 2. Konstantin der Große (306–337): Monarchisierung und Christianisierung

### 2.1 Die Rückkehr zur Monarchie<sup>30</sup>

Das tetrarchische System ist an seinen beiden originellsten und zugleich revolutionärsten Elementen gescheitert: an dem Ausschluß der leiblichen Kaisersöhne von der Nachfolge und an der Idee der freiwilligen Abdankung. Zwar verlief der Übergang zur zweiten Tetrarchie am 1. 5. 305 noch komplikationslos, doch als der neue Augustus Constantius I. Chlorus bereits im Juli 306 in Britannien starb, riefen die Truppen unverzüglich seinen Sohn Konstantin zum Augustus aus. Zunächst konnte Galerius diese Situation noch einmal entschärfen, indem er den Caesar Severus zum Augustus und dafür Konstantin (neben Maximinus Daia) zum Caesar machte (dritte Tetrarchie), doch bereits im Herbst desselben Jahres proklamierten in Rom – ganz im Stil des 3. Jahrhunderts – die Prätorianer (zusammen mit Senat und Volk) den Sohn Maximians, Maxentius, zum Kaiser. Ihm blieb die Anerkennung durch die amtierenden Tetrarchen versagt, doch der gegen ihn gesandte Severus fand 307 den Tod; Maxentius, der gezielt die ‚stadtrömische Karte‘ spielte (vgl. M 4), blieb unbehelligt, und sein Vater Maximian beanspruchte sogar auch wieder eine aktive Rolle als Augustus. Angesichts dieser Sachlage übernahm der emeritierte „senior Augustus“ Diokletian noch einmal den Konsulat und schuf 308 auf der Konferenz von Carnuntum die vierte (und letzte) Tetrarchie: Neben Galerius trat als neuer Augustus (ohne vorheriges Caesariat!) der ebenfalls aus dem Illyricum stammende Offizier Licinius, die Caesares (Konstantin und Maximinus Daia) blieben im Amt, und Maximian trat erneut zurück. Das tetrarchische System hatte jedoch seine Lebens- und Überzeugungskraft eingebüßt: Bereits 310 gab es vier legale Augusti, da die Caesares ihre Inferiorität nicht länger akzeptierten, während Maxentius weiterhin Rom sowie beträchtliche Teile Italiens und Nordafrikas beherrschte und sein Vater Maximian nach einem erneuten, erfolglosen ‚Comeback‘-Versuch 310 Selbstmord beging. Als Galerius 311 starb, gab es keine Versuche mehr, die Tetrarchie zu restituieren, sondern es herrschte Bürgerkrieg

---

<sup>30</sup> Ausführlich zur Ereignisgeschichte und den Quellen: Demandt (1989) 61ff.

zwischen den Machtrivalen. Konstantin gab folgerichtig seinen bisher praktizierten Anschluß an die Herculus-Ideologie auf und fingierte nun seine Abstammung von dem Kaiser Claudius II. Gothicus (268–270), um eine eigene dynastische Tradition zu begründen. Am 28. Oktober 312 besiegte er, nach einer angeblichen christlichen Vision (M 19), Maxentius in der berühmten Schlacht nahe der Milvischen Brücke (M 13), 313 nahm sich Maximinus Daia in militärisch aussichtsloser Lage das Leben, und von 313 bis 324 regierten fortan die beiden Augusti Konstantin (im Westen) und Licinius (im Osten) das Imperium eher gegen- als miteinander. 324 kam es schließlich zur großen Entscheidungsschlacht bei Adrianopel, und der siegreiche Konstantin amtierte künftig als alleiniger Augustus.

Die Monarchie alten Stils war wiederhergestellt, und dementsprechend betrieb Konstantin auch eine traditionelle dynastische Politik: Seine drei jüngeren Söhne – den ältesten, Crispus, hatte er 326 zusammen mit anderen Verwandten und seiner Ehefrau Fausta wahrscheinlich aus Angst vor deren politischen Ansprüchen grausam ermorden lassen – und einen Neffen ernannte er zu Caesares, denen er bei seinem Tod (22. 5. 337) eine trotz wahrscheinlich vorhandener Nachfolgeregelungen letztlich doch labile Situation als schwere Hypothek hinterließ (vgl. M 26).

## 2.2 Rom und Barbaren: Eine neue Strategie?

Im Zentrum der modernen wissenschaftlichen Debatte um Konstantin steht zweifellos seine Religionspolitik (siehe unten 2.5), doch auch andere Elemente seiner Politik sind Gegenstand lebhafter Diskussionen, darunter seine Außenpolitik, insbesondere deren Spätphase. Allerdings leidet die Debatte unter der schwierigen Quellenlage, da neben den nur kurzen Geschichtsabrissen (Breviarien) des 4. Jahrhunderts vorwiegend spätere, häufig tendenziöse Berichte zur Verfügung stehen und auch Inschriften sowie Münzen selten gesicherte Daten und Ereignisse bieten.

Immerhin sind Germanenfeldzüge Konstantins zwischen 306/7 und 313 einwandfrei belegt,<sup>31</sup> die zu einer langfristigen Stabilisierung der Rheingrenze führten. 315 folgten wahrscheinlich erfolgreiche Expeditionen gegen Goten und Sarmaten an der Donau,<sup>32</sup> und auch im Osten konnte zumindest auf diplomatischem Wege eine Stabilisierung der römischen Position gegen die Perser erzielt werden.<sup>33</sup> In der Herrschaftspropaganda wurden selbst derartige Übereinkünfte als Ausdruck römischer Sieghaftigkeit gepriesen,

31 Grünewald (1990) 104 mit Anm. 250.

32 Grünewald, ebd. 107; zur Forschungslage jetzt Lippold (1992) 379.

33 Barceló (1981) 75ff.

wie die lange Liste der bereits in einer Inschrift von 318 für Konstantin verzeichneten Siegesbeinamen dokumentiert (M 14: ILS 696). 322 fanden erneut – in der Münzprägung durch Emissionen mit der siegverkündenden Aufschrift „Sarmatia devicta“ gefeierte<sup>34</sup> – Feldzüge gegen die Sarmaten statt, die möglicherweise durch einen Vertrag („foedus“) abgeschlossen wurden,<sup>35</sup> und 323 provozierten Goteneinfälle<sup>36</sup> in Moesien und Thrakien einen erneuten Krieg gegen die Goten.

In der Folgezeit hielt sich Konstantin überwiegend im Donauraum auf und betrieb eine dezidierte Grenzsicherungspolitik, die in der (328 erfolgten) Anlage einer Steinbrücke über die Donau ihren Höhepunkt fand.<sup>37</sup> Die erwähnten Forschungskontroversen beziehen sich sowohl auf die Interpretation dieser konstantinischen Maßnahmen (beabsichtigte der Kaiser eine Wiedereroberung Dakiens?) und der einschlägigen numismatischen Zeugnisse<sup>38</sup> als auch insbesondere auf das anschließende Geschehen von 332. Denn in diesem Jahr kam es zu erneuten militärischen Auseinandersetzungen zwischen Römern und Goten, die in dem berühmten Gotenfoedus von 332 gipfelten. Die später noch detaillierter darzustellende Diskussion um diesen Vertrag (M 15) betrifft die Frage, ob bereits jetzt die Goten zu reichsangehörigen Föderaten geworden wären (was spätestens seit 383 nachweislich der Fall war). Aufgrund neuerer Forschungen wird man diese Frage verneinen müssen,<sup>39</sup> gleichwohl hat Konstantin mit der wahrscheinlich in dem „foedus“ verankerten Vereinbarung einer fakultativ zu leistenden Waffenhilfe der Goten eine sinnvolle Strategie eingeschlagen. Ob dieser Vertrag darüber hinaus mit eventueller Intensivierung der römisch-gotischen Kontakte auch als Movens der späteren Christianisierung der Goten anzusehen ist, muß freilich dahingestellt bleiben.<sup>40</sup>

34 Vgl. Grünewald (1990) 130; Lippold (1992) 377f.

35 So Lippold, ebd., 378.

36 Die einzige Quelle ist die *Origo Constantini* c. 21 (näheres unten S. 112ff.).

37 Vgl. Bleckmann (1995) 45ff., 61. Die Brücke verband den Ort Oescus mit dem am jenseitigen Ufer gelegenen Kastell Sucidava und entsprach der Köln-Deutzer-Anlage: Das unter Konstantin angelegte Kastell Deutz (CIL XIII 8502) bildete einen rechtsrheinischen Brückenkopf und war über die Rheinbrücke mit dem kölnischen Raum links des Rheins verbunden.

38 Vgl. Bleckmann, ebd., 45 und 50f mit Anm. 81.

39 Näheres unten Seite 112ff.

40 Vgl. Lippold (1992) 389f.

## 2.3 Eine neue Hauptstadt? Konstantinopel

Bereits die spätantiken Quellen haben einen Bogen geschlagen von den militärischen Erfolgen Konstantins zur Gründung von Konstantinopel. So heißt es in der Kirchengeschichte des Sozomenos (5. Jahrhundert): „Weil ihm nämlich alle Dinge nach Wunsch gelangen und er auch durch seine Kriege und durch die Friedensverträge die Beziehungen zu den Barbaren in erfolgreicher Weise geordnet hatte, beschloß er, eine Stadt zu gründen, die seinen Namen hatte und mit Rom gleichrangig war.“<sup>41</sup> Wenn auch Sozomenos und anderen späteren Historiographen die chronologischen Details nicht immer deutlich vor Augen standen,<sup>42</sup> so trafen sie insofern das Richtige, als tatsächlich Münzen um 332 die Stadtgründung eindeutig mit der Sieghaftigkeit des Kaisers Konstantin assoziieren.<sup>43</sup> Nicht nur ein Siegegssymbol, sondern zugleich eine neue Hauptstadt habe Konstantin errichten wollen – so jedenfalls lautet die herrschende Gelehrtenmeinung bis in die jüngste Zeit.<sup>44</sup> Demgegenüber hat H. Chantraine zu Recht darauf aufmerksam gemacht, daß Konstantin die seit 324 durch ein großangelegtes Bauprogramm von Byzanz zu Konstantinopel umgestaltete Stadt deutlich hinter Rom zurücksetzte: Es gab hier weder Prätores noch einen Stadtpräfekten („*praefectus urbi*“), sondern nur einen „*proconsul*“, auch galten die Angehörigen des neugeschaffenen, konstantinopolitanischen Senats nur als „*clari*“, im Gegensatz zu den „*clarissimi*“ in Rom.<sup>45</sup> Ohne Zweifel wollte Konstantin ein monumentales Denkmal seiner selbst mit durchaus christlich geprägtem Charakter (M 16: Stadtplan von Konstantinopel) schaffen, aber keine Kapitale anstelle Roms: „Konstantinopel war... ein zweites, aber deutlich abgestuftes Rom und vor allem die Stadt Konstantins.“<sup>46</sup> Erst unter Constantius II. und vor allem unter Theodosius I. sollte das „neue Rom“ tatsächlich der alten, traditionsreichen Hauptstadt in Rang, Titulatur und administrativer Ausstattung angeglichen werden.

41 Sozom. HE 2,3,2 (Übersetzung: Bleckmann (1995, 55).

42 Sozomenos und Iordanes (Get. 112) unterstellen, das Gotenfoedus sei schon vor der Gründung Konstantinopels abgeschlossen worden, siehe Bleckmann, ebd. 55 Anm. 104.

43 Vgl. Bleckmann, ebd. 55f.

44 Siehe die Angaben bei H. Chantraine, Konstantinopel: vom Zweiten Rom zum Neuen Rom, GWU 43, 1992, 3f., ferner Demandt (1989) 75 und jetzt noch Bleckmann, ebd. 56.

45 Chantraine, ebd., 5f.

46 Ebd., 8.

## 2.4 Eine neue Währungspolitik? Der „aureus solidus“

Während in der älteren Forschung Konstantin auch auf den Feldern der Fiskal- und Geldpolitik sowie im Verwaltungswesen grundlegende Reformen zugeschrieben wurden, hat sich in den letzten Jahrzehnten die Erkenntnis durchgesetzt, daß Konstantin hier eher als Fortsetzer tetrarchischer Neuerungen zu begreifen ist.<sup>47</sup> Immerhin wird ihm weiterhin eine bahnbrechende Innovation zugeschrieben: die Einführung einer neuen Goldmünze, des „solidus“, der bis weit in die byzantinische Zeit hinein stabil geblieben und zur Grundlage einer neuen Geldwirtschaft geworden sei<sup>48</sup> (vgl. M 18). Zumindest gewisse Einschränkungen sind hier geboten, und ob das vieldiskutierte Zeugnis des Anonymus de rebus bellicis (2,1-2: M 17) einen literarischen Beleg für konstantinische Neuerungen bietet, bleibt ebenfalls zumindest diskutabel (unten Seite 123ff.). Jedenfalls bieten die lateinischen Fragmente des diokletianischen Preisediktes (vgl. M 7) aus Aizanoi einen klaren Beleg dafür, daß bereits unter der Tetrarchie die Münzbezeichnung „solidus“ üblich war.<sup>49</sup> Immerhin modifizierte Konstantin geringfügig Gewicht und Goldgehalt des „solidus“: Statt der diokletianischen Relation (1 „aureus solidus“ = 1/60 Pfund) galt nun eine Relation von 1/72 Pfund pro „solidus“. Während dieser Goldstandard tatsächlich viele Jahrhunderte lang Bestand haben und für stabile Preise in Gold sorgen sollte, entziehen sich die monetären Entwicklungen ansonsten einer klaren Bewertung: Aus Papyri wissen wir, daß die Gold-Bronze-Relationen weiterhin stark schwankten und vor allem die in Bronzenominalen ausgedrückten Preise enorm stiegen.<sup>50</sup> Ob man daher von inflationären Prozessen im ausgehenden 4. Jahrhundert ausgehen muß, ist weiterhin stark umstritten.<sup>51</sup>

47 Demandt (1989) 77; Cameron (1994) 68f.

48 Siehe nur Demandt, ebd. und Cameron, ebd.; ferner F. de Martino (1991) 425. Noch jüngst insistiert E. Lo Cascio (1995) 45 auf der seit Jahrzehnten vor allem in der italienischen Forschung postulierten ‚währungspolitischen Revolution Konstantins (‚rivoluzione monetaria operata da Costantino‘); vgl. zur älteren Literatur Brandt (1988) 30.

49 Jahn (1975) 96. 103 mit Anmerkung 53; vgl. Brandt, ebd.

50 Vgl. nur Brandt (1988) 30ff. und zuletzt Lo Cascio (1995).

51 Näheres unten zu M 17.

## 2.5 Der neue Kurs (I): Die ‚konstantinische Wende‘

Alle bisher genannten Forschungskontroversen stehen freilich eindeutig im Schatten der immer noch lebhaft diskutierten sog. konstantinischen Frage, in der es um den Ursprung, das Ausmaß, die Beweggründe und die Ziele der unverkennbaren Förderung des Christentums seitens Konstantins geht.<sup>52</sup> Besonders umstritten sind dabei immer noch die Interpretationen der ‚christlichen Vision‘ Konstantins vor der Schlacht nahe der Milvischen Brücke im Oktober 312 (M 19), Datierung und Deutung der Silbermultiplums mit dem XP-Monogramm aus der Münzstätte Ticinum (M 22), das Bildprogramm und die Inschrift des Konstantinsbogens in Rom (M 20–21) sowie die Berichte und Selbstäußerungen des Kaisers im Rahmen der innerkirchlichen Konflikte. Da bei diesen und weiteren Detailproblemen selten eindeutige Lösungen zu erzielen, sondern in der Mehrzahl nur plausible Erwägungen zu formulieren sind, entzieht sich letztendlich auch die übergeordnete Frage, ob Konstantins Begünstigung des Christentums auf politisches Kalkül oder auf religiöse Überzeugung zurückzuführen ist, bislang einer klaren Beantwortung.<sup>53</sup>

Neue Nahrung hat die Diskussion zuletzt durch Bleicken sehr pointierte, in den Grundthesen freilich kaum überzeugende Abhandlung erhalten. Bleicken begreift die religionspolitischen Entwicklungen dieser Zeit primär als Ausdruck politischer Zweckrationalität seitens der Protagonisten. So habe Galerius mit der Einstellung der Christenverfolgungen im Jahr 311 (M 24) nur das Ziel verfolgt, im Osten, wo die Verfolgungen intensiv betrieben worden waren, für eine innenpolitische Beruhigung zu sorgen, zumal im Westen die diokletianischen Vorgaben kaum befolgt worden waren. Und die bahnbrechende Übereinkunft vom Februar 313 in Mailand zwischen Konstantin und Licinius, welche das Christentum in den Rang einer den anderen Kulte gleichberechtigten Religion erhob, sei Ausfluß des Bestrebens vor allem von Licinius gewesen, die Christen im Osten gegen den scharfen

52 Zum neuesten Stand der Forschung siehe nur Bleicken (1992); Bringmann (1995) 21–47; Bleckmann (1996), besonders 58ff. und jetzt vor allem Girardet (1998); siehe auch K. Gross-Albenhausen, Zur christlichen Selbstdarstellung Constantins, *Klio* 78, 1996, 171–185.

53 Müßig erscheint mir der Versuch, frühe, weit vor 312 zu datierende christliche Neigungen Konstantins nachweisen zu wollen (so, neben T. D. Barnes, *Classical Views* 29, 1985, 371–391, etwa P. A. Barceló, Die Religionspolitik Kaiser Constantins des Großen vor der Schlacht an der Milvischen Brücke, *Hermes* 116, 1988, 76–94), da die späteren, tendenziösen Nachrichten aus der Feder christlicher Autoren (Laktanz, Eusebius) keine Glaubwürdigkeit beanspruchen können. Vgl. Grünewald (1990) 80ff.; Girardet (1998) 22ff.

Christenverfolger Maximinus Daia aufzuwiegeln.<sup>54</sup> Demgegenüber hat jüngst K. Bringmann in seiner Auseinandersetzung mit Bleicken zu Recht vor allem auf die Dokumente des Donatistenstreites und der Kontroversen um den Arianismus verwiesen,<sup>55</sup> in denen Konstantin sich „als Bruder in Christo“ stilisiert habe, mehr noch: „was Konstantin tat, lief auf die Erhebung des katholischen Kultus in den Rang einer Staatsreligion hinaus.“<sup>56</sup>

Es gilt nun immerhin zu bedenken, daß Konstantin primär gegenüber Christen bzw. im Kontext religionspolitischer Angelegenheiten seine Nähe zu deren Glauben deutlich erkennen ließ und in seiner Gesetzgebung im wesentlichen über eine Gleichstellung der christlichen Kirche und ihrer Kleriker mit den Institutionen und Würdenträgern der alten heidnischen Staatskulte nicht hinausgegangen ist.<sup>57</sup> Daß nach dem Sieg über Licinius „der frontale Angriff auf das Heidentum“<sup>58</sup> eingesetzt habe, erscheint – trotz eines möglicherweise in CTh 16,10,2 indirekt überlieferten Verbots heidnischer Opfer<sup>59</sup> – daher etwas übertrieben. So behielt Konstantin die seit Augustus für den Kaiser kanonische Funktion eines obersten Sakralbeamten („pontifex maximus“), prägte weiterhin Münzen mit Darstellungen heidnischer Gottheiten (vor allem des Sonnengottes Sol Invictus), und noch 333/335 konzidierte er den Bau eines Tempels für das eigene (flavische) Kaiserhaus, verbat sich dabei freilich allzu blutige Opferhandlungen.<sup>60</sup> Als Teilneh-

54 Bleicken (1992).

55 Bringmann (1995) besonders 38ff.; einschlägige Texte mit deutscher Übersetzung versammelt V. Keil, *Quellensammlung zur Religionspolitik Konstantins des Großen*, Darmstadt 1989, 72–145. Von besonderer Bedeutung ist hier das Schreiben Konstantins an den heidnischen, afrikanischen Prokonsul Anullinus von Ende 312/Anfang 313 (Eus. HE 10,7,1 = v. Soden [1950] Nr. 9, 4–15). Konstantin schreibt darin mit Blick auf das Christentum: Aus vielen Dingen sei deutlich geworden, daß die Gottesverehrung dem römischen Namen größtes Glück und der gesamten Menschheit außerordentlichen Segen gebracht habe. In dieser Äußerung artikuliert sich möglicherweise Konstantins selbst erfahrene und empfundene Bekehrung zum Christentum. Entsprechendes gilt für den Brief Konstantins aus dem Jahr 314 an die zu einem Konzil in Arles versammelten Bischöfe: v. Soden (1950) Nr. 18, 1–15. Darin bezeichnet sich der Kaiser als gläubiger Christ, und der Christengott wird als allmächtiger Gott („deus omnipotens“) titulierte.

56 Bringmann, ebd. 39; noch dezidiert in diesem Sinne jetzt Girardet (1998).

57 Allerdings hat er die christlichen Kleriker schon 312/13 mit besonderen steuerlichen Immunitäten bedacht, s. F. Vittinghoff, *Staat, Kirche und Dynastie beim Tode Konstantins*, in: Dihle (1989) 14ff. Zwar artikuliert sich in dieser Politik die unbezweifelbare Nähe Konstantins zum Christentum, nicht jedoch schon eine Erhebung des Christentums zur Staatsreligion.

58 Bringmann, ebd. 42.

59 Zum Stand der Debatte siehe Bringmann, ebd. 42 mit Anm. 69; Girardet (1998) 93f.

60 ILS 705.

mer an Konzilien begegnet Konstantin erst seit 325,<sup>61</sup> und immerhin ist auch die Gründung von Konstantinopel teilweise nach heidnischem Ritus zelebriert worden.<sup>62</sup>

Ungeachtet dieser relativierenden Bemerkungen bleibt jedoch unbestreitbar, daß Bleicken die Religionspolitik in allzu starkem Maße auf Machtpolitik reduziert und Konstantins religiöse Beweggründe unterschätzt hat, daß man weiterhin von einer bahnbrechenden konstantinischen Wende sprechen muß und daß diese Wende den Weg für die Christianisierung von Staat und Gesellschaft im spätantiken Imperium Romanum und damit für einen das gesamte Mittelalter und die Neuzeit bedeutsamen Prozeß geebnet hat. Seit der Herrschaft Konstantins befand sich das Heidentum auf den meisten politischen und sozialen Ebenen in der Defensive, und die endgültige, rechtswirksame Etablierung des Christentums als Staatsreligion unter Theodosius I. war denn auch weniger ein revolutionärer Akt als vielmehr Endpunkt und Besiegelung längst vollzogener Entwicklungen.

## 2.6 Der neue Kurs (II): Christen, Häretiker, Heiden und Juden

Trotz der aus welthistorischer Perspektive kaum zu überschätzenden Hinwendung Konstantins zum christlichen Monotheismus blieb natürlich die überwiegende Mehrheit der Reichsbevölkerung weiterhin – und zwar noch weit über den Tod Konstantins hinaus – heidnisch und hielt an dem traditionellen Götterkanon fest.<sup>63</sup> Es entstand folglich ein gravierendes, angesichts des jahrhundertlang geltenden Polytheismus und der ihm inhärenten Toleranz gegenüber vielfältigen Religionsrichtungen bislang kaum bekanntes Problem:<sup>64</sup> der Konflikt zwischen einer genuin intoleranten, da mit dem alleinigen Wahrheitsanspruch versehenen und nun sogar von der politischen Spitze favorisierten Christentums auf der einen und einer Vielzahl andersartiger Religionen auf der anderen Seite. Das Galeriusedikt von 311 (M 24)

61 K. M. Girardet, Kaiser Constantin der Große als Vorsitzender von Konzilien, in: Bonamente/Fusco I, 1992, 445–459; ders., Der Vorsitzende des Konzils von Nicaea – Kaiser Konstantin der Große, in: Festschrift A. Lippold, 1993, 331–360.

62 Vgl. Demandt (1989) 76, ferner unten M 16.

63 Der Versuch, den Anteil der Christen an der Gesamtbevölkerung des frühen 4. Jhs. zu quantifizieren, sieht sich unüberwindlichen Quellenproblemen gegenüber; vielleicht kann man mit Girardet (1998) von ca. 10 % Christen ausgehen.

64 Vgl. allgemein Noethlichs (1996) Kap. 4 (27–43): „Pluralismus als Herrschaftsprinzip: Möglichkeiten und Grenzen von Toleranz und Integration in der römischen Gesellschaft.“

hatte tatsächlich das alte Toleranzprinzip bestätigt und jetzt auf das Christentum ausgedehnt, welches nun als „zugelassene Religion“ („*religio licita*“) eine unter vielen anderen sein durfte – doch konnte es aus der Sicht des Christentums überhaupt mehrere „*religiones licitae*“ geben? Wie verhielt sich Konstantin, der immerhin „*pontifex maximus*“ blieb, in diesem prinzipiellen Konflikt?<sup>65</sup>

Ein Blick in die recht ausführlichen einschlägigen Quellen<sup>66</sup> führt rasch zu einer klaren Erkenntnis: Konstantin blieb trotz seiner unbestreitbaren persönlichen Affinität zum Christentum politischer Pragmatiker und agierte nicht als ‚Missionar auf dem Kaiserthron.‘ Gleichwohl fand er nicht nur in der an christliche Glaubensbrüder gerichteten Korrespondenz, sondern auch in reichsweit proponierten Rechtssetzungen deutliche Worte gegen die heidnischen Kulte und deren Anhänger und war ferner um eine einheitliche Linie innerhalb der Christen bemüht.

Letzteres, um damit zu beginnen, stellte sich als überaus schwierig dar. Denn unmittelbar nach seiner auch offiziell erkennbaren Hinwendung zum Christentum (312/13) hatte Konstantin auf die in Nordafrika ausgebrochenen innerchristlichen Unruhen einzugehen, die als Donatismusstreit bezeichnet werden.<sup>67</sup> Die Konflikte resultierten aus den Begebenheiten während der tetrarchischen Christenverfolgung (M 11) und drehten sich um die Frage, wer ‚standhafter Christ‘ geblieben und wie mit den „Lauen und Gottverleugnenden“,<sup>68</sup> den ‚(Ab-)gefallenen‘ („*lapsi*“), umzugehen sei. Konstantin setzte auf eine (letztlich erfolglose) Doppelstrategie: auf Druck und Integrationsbereitschaft.<sup>69</sup> Er berief die hier erstmals begegnenden großen Konzilien (Bischofsversammlungen) ein<sup>70</sup> und nahm in seinen dabei getätigten Äußerungen kein Blatt vor den Mund: Die Frömmigkeit „unseres Got-

65 Grundlegend zu diesem Komplex, mit der gesamten einschlägigen Literatur, ist jetzt Girardet (1998).

66 Wichtig sind vor allem Konstantins Selbstaussagen im Rahmen des Donatistenstreites: (v. Soden 1950); Auswahl: V. Keil, *Quellensammlung zur Religionspolitik Konstantins des Großen*, 1989, 72–95) und im Kontext der Auseinandersetzungen um den Arianismus (Auswahl: Keil, ebd., 96–145), ferner einschlägige Gesetze in den spätantiken *Codices*; vgl. Girardet (1998) 18ff.

67 Grundlegend immer noch: W. H. C. Frend, *The Donatist Church*, 1952.

68 J. Bleicken, *Verfassungs- und Sozialgeschichte des römischen Kaiserreiches* Bd. 2, 3. Aufl. 1994, 217.

69 Dazu jetzt Girardet (1998) Kap. VI: „Politik der Christianisierung II. Ketzer und ‚Katholiken‘.“

70 K. M. Girardet, *Die Petition der Donatisten an Kaiser Konstantin (Frühjahr 313) – Historische Voraussetzungen und Folgen*, *Chiron* 19, 1989, 185–206; ders., *Konstantin und das Reichskonzil von Arles (314)*, in: *Festschrift W. Schneemelcher*, Genf 1985, 151–174.

tes“ („dei nostri“) dulde es nicht, daß durch böswillige Geisteshaltung der christliche Heilsweg verdunkelt und verstellt werde.<sup>71</sup> Die (in diesem Falle donatistischen) Abweichler werden folglich als Ketzer perhorresziert.

Noch schärfer ging Konstantin in Wort und Tat gegen die Arianer vor, welche die Wesensgleichheit von Gottvater und Gottessohn bezweifelten.<sup>72</sup> Versammlungsverbote, Bücherverbrennungen und gar die Drohung mit der Todesstrafe gehörten nun zum Waffenarsenal des christlichen Kaisers gegen die ketzerischen Abtrünnigen.<sup>73</sup> Doch auch auf diesem Feld verzeichnete Konstantin nur Teilerfolge – vor allem unter der Herrschaft seiner Söhne sollte der Arianismus ein bedeutender, das ganze Reich betreffender Konfliktthema bleiben.<sup>74</sup>

Von erheblich größerer Bedeutung als die geschilderten Probleme war jedoch, aus reichspolitischer Perspektive betrachtet, der Umgang Konstantins mit der paganen Mehrheit der Reichsbevölkerung. Auch hier läßt sich eine ambivalente Haltung des Kaisers erkennen: Verbale Attacken mit antiheidnischen Ausfällen stehen neben einer ausgesprochen maßvollen politischen Praxis,<sup>75</sup> die sogar auch auf symbolisch gemeinte, proheidnische Handlungen – wie z. B. auf den Bau heidnischer Kultgebäude in Konstantinopel (M 16) – nicht verzichtete. So schränkte Konstantin zwar allzu blutige Exzesse bei Opferhandlungen ein, zu einem allgemeinen Opferverbot hat er sich aber wahrscheinlich – trotz CTh 16,10,2 – nicht verstiegen.<sup>76</sup> Auch in seiner Personalpolitik ließ Konstantin sich offenbar von zweckrationalen Überlegungen leiten: Von einer Diskriminierung heidnischer Ämterkandidaten ist nichts bekannt.

71 So Konstantin in einem Brief von 314 an die Synodalen in Arles: v. Soden (1950) Nr. 18,32. Fraglich bleibt meines Erachtens – trotz Girardets (1998) glänzender und anderslautender Argumentation –, ob diese in christlichem Kontext verfaßten Briefe Konstantins tatsächlich als allgemeingültige Glaubensverlautbarungen gelten können; im übrigen zeugt auch der immer wieder in diesem Zusammenhang angeführte Brief des Kaisers an den heidnischen Prokonsul Anullinus (Eus. HE 10,7,1f. = v. Soden [1950] Nr. 9, 4–15) meiner Auffassung nach noch nicht von einem dezidiert christlichen Monotheismus Konstantins, sondern von seiner unverkennbaren Bevorzugung des christlichen Glaubens vor allen anderen Religionen – für deren Existenz blieb er gleichwohl als „pontifex maximus“ weiterhin ein wichtiger Garant.

72 Zum Arianismus s. etwa A. R. Ritter, Art. Arianismus, TRE 3, 1978, 692–719; R. L. Williams, Arius, Heresy and Tradition, 1987.

73 Eus. Vita Const. III, 64f.; vgl. Girardet (1998) 99ff.

74 Vgl. u. I 3.2.

75 Siehe jetzt Girardet (1998) Kap. V. 3.3: „Der Paganismus in Proklamationen und politischer Praxis.“ Eine bedeutsame Quelle ist Konstantins bei Eusebius (Vita Const. II 48–60) überlieferter Brief an die Provinzialen vom Jahr 324.

76 Vgl. jetzt Girardet (1998) 93f. mit Anm. 338.

Gesonderte Betrachtung verdient schließlich noch Konstantins Umgang mit den Juden, die sich seit Jahrhunderten eines besonderen Rechtsstatus erfreuten, aber bereits aus frühchristlicher Sicht als Mitschuldige am Tod Christi gebrandmarkt worden waren.<sup>77</sup> Ausdruck der traditionellen religionspolitisch und rechtlich manifestierten Toleranz der Römer war etwa das ausschließlich den Juden konzedierte Privileg, die Beschneidung praktizieren zu dürfen, ferner die rechtlich garantierte Ausübung des Sabbats sowie die partielle Befreiung der Juden von der Pflicht zum Militärdienst; auch fiskalische Sonderbestimmungen wären hier zu nennen.

Im Prinzip hat Konstantin an der Anerkennung von Juden als einer besonderen Glaubensgemeinschaft festgehalten und auch deren Geistlichkeit die gängigen steuerlichen Privilegien belassen.<sup>78</sup> Andererseits lassen seine einschlägigen Gesetze<sup>79</sup> erkennen, daß er vor allem darum bemüht war, die Konversion von Juden zum Christentum zu befördern und den umgekehrten Weg zu verstellen. Besonders charakteristisch für Konstantins persönliche Haltung sind seine Ausfälle gegen die Juden in seinem wiederum bei Eusebius tradierten Brief (= M 25) an die seinerzeit nicht beim Konzil von Nikaia (325) anwesenden Bischöfe: Grobe Vorwürfe an die Juden stehen neben einer moderaten Behandlung der Juden in praxi und dokumentieren erneut das schon mehrfach hervorgehobene religionspolitische Prinzip Konstantins: Das Christentum wurde dezidiert gefördert und nach Möglichkeit privilegiert, ohne gegenüber anderen Kulte und Glaubensgemeinschaften in praktizierte Intoleranz oder gar systematische Unterdrückung und Verfolgung zu verfallen. So bleibt abschließend festzuhalten, daß in Konstantins Regierungszeit nicht nur die bis heute bedeutsamen Ursprünge des christlichen Abendlandes zu suchen sind, sondern auch die Wurzeln derjenigen Konflikte, die das gesamte Mittelalter und die Neuzeit prägen sollten und die sich mit den Stichworten ‚Kirchenspaltungen, Ketzerverfolgungen und Judenhaß‘ knapp umreißen lassen.

77 Noethlichs (1996) 76ff. (zur Rechtslage); siehe jetzt ferner Girardet (1998) 81ff.; zur Judenfeindschaft der Christen s. etwa (aus dem späten 2. Jh. n. Chr.) Tert. Apol. 7,3.

78 CTh 16,8,2.4.

79 CTh 16,8,1–5. Const. Sirm. 4.

---

### III. Anhang

---

### 3. Glossar

#### Adäration:

Unter der „adaeratio“ versteht man die Ersetzung von Natural- durch Geldleistungen. Sowohl die von den Reichsbewohnern zu leistenden Steuerzahlungen (Steueradäration) als auch die staatlichen Gehaltszahlungen (Verteilungsadäration) konnten in Geld statt in Naturalien erfolgen. Zu Konflikten konnte es bei der Frage kommen, zu welchem Tarif (Marktpreis oder staatlich fixiertem Festpreis) adäriert werden sollte.

#### Apotheose:

Die in Rom mit der Erklärung des toten Caesar zum Divus Iulius erstmals praktizierte Vergöttlichung (griech. „apotheosis“, latein. „consecratio“) eines Herrschers steht in griechisch-orientalischer Tradition. Im Laufe der Kaiserzeit wurde die Apotheose beinahe zum normalen Vorgang nach dem Tode eines Kaisers – sogar christlichen Kaisern, wie Konstantin dem Großen, ist noch die Konsekration zuteil geworden.

#### Arianismus:

Der nach dem alexandrinischen Presbyter Arius benannte Arianismus entstand im Zuge der theologischen Diskussion um die Natur Jesu. Arius bezweifelte die Wesenseinheit von Gottvater und Jesus, doch auf dem Konzil von Nikaia (325) wurde das „nicänische Glaubensbekenntnis“ der Wesensgleichheit fixiert. Der Attraktivität arianischer Auffassungen tat dies jedoch keinen Abbruch, und sogar Kaiser wie Constantius II. standen ihm nahe. Unter Theodosius I. als Häresie verboten, lebte der Arianismus dennoch weiter.

#### Aurum coronarium:

Das „Kranzgold“, schon von siegreichen Imperatoren in der republikanischen Zeit eingefordert, wurde in der Kaiserzeit als nahezu reguläre Abgabe erhoben. In der Spätantike bildete das anlässlich eines Herrschaftsantritts oder von Regierungsjubiläen fällig werdende „aurum coronarium“ eine

wichtige, vor allem von den städtischen Führungsschichten zu erbringende Einnahmequelle für die Kaiser.

**Bagauden:**

Unter diesem (keltischen) Namen begegnen erstmals im späten 3. Jh. n. Chr. in Gallien große Banden, die sich u. a. aus Bauern, Landarbeitern und entlassenen oder desertierten Soldaten sowie entlaufenen Sklaven zusammensetzten. Trotz ihrer Niederlage gegen Maximian blieben sie noch bis weit ins 5. Jahrhundert hinein eine bedeutende Gefahr für die römischen Herrscher. Ihre Hauptanliegen sind schwer zu ermitteln; in den spätantiken Quellen werden sie vorwiegend als „latrones“ (Räuber) abqualifiziert, doch haben sie nach Ausweis von Münzprägungen im späten 3. Jahrhundert sogar einen Gegenkaiser ausgerufen.

**Caesar:**

Der Beiname („cognomen“) des berühmten Diktators und Adoptivvaters des späteren Kaisers Augustus wurde Bestandteil der kaiserlichen Titulatur und seit dem 2. Jh. n. Chr. zur Bezeichnung für den designierten Thronfolger. In der diokletanischen Tetrarchie bezeichnete er den unter dem Augustus rangierenden Mitkaiser, und in diesem Sinne von ‚Unterkaiser‘ begegnet der Begriff auch noch im weiteren Verlauf des 4. Jahrhunderts.

**Ciborium:**

Der Begriff bezeichnet den Überbau eines Altars (oder auch eines Thrones oder Brunnens), eine auf Säulen oder Pilastern ruhende Bedachung. Ähnlich dem Baldachin gehört das Ciborium zur Zierarchitektur. Das ursprünglich pagane Motiv ist im 4. Jahrhundert in die christliche Kunst und Architektur aufgenommen und in der mittelalterlichen und neuzeitlichen Kirchenarchitektur weiterentwickelt worden.

**corrector:**

In der Kaiserzeit fungierte der „corrector“ als außerordentlicher, bei Bedarf vom Kaiser bestellter Kontrolleur, um das Finanzgebaren der Städte zu beaufsichtigen. In der Spätantike hingegen amtierten „correctores“ in Italien als Distriktgouverneure und im außeritalischen Raum als Provinzstatthalter.

**damnatio memoriae:**

Die vom Senat zu beschließende „damnatio memoriae“ galt verstorbenen Kaisern, die sich unbeliebt gemacht hatten – die Annullierung ihrer Regierungsakte, die Vernichtung ihrer Statuen und Porträts sowie die Erasion ihrer Namen auf Inschriften sollten sie der Strafe des Vergessenwerdens

ausliefern. Nero (68 n. Chr.), Maximinus Thrax (238 n. Chr.) und Licinius (325 n. Chr.) sind zum Beispiel der „*damnatio memoriae*“ anheim gefallen.

#### Diözese:

Diözesen wurden in der Spätantike (vielleicht erst seit der Zeit Konstantins) als Unterbezirke der Präfecturen geschaffen und gliederten sich selbst wiederum in die verschiedenen Provinzen. Im 4. Jahrhundert existierten 12–14 Diözesen, denen Vikare als Vertreter der Prätorianerpräfecten vorstanden. Sie hatten vor allem Aufgaben in der Rechtsprechung zu versehen.

#### Donatismus:

Der Donatismus ist ein Resultat der tetrarchischen Christenverfolgung. Donatus wurde von rigoristischen Anhängern im Jahr 313 als Gegenbischof zu Caecilianus zum Bischof von Karthago gewählt, da letzterem vorgeworfen wurde, die Weihe von einem Bischof empfangen zu haben, der seinem Glauben und seinem Amt während der Verfolgung nicht treu geblieben wäre. Unter Donatus wurde der Donatismus zu einer afrikanischen Massenbewegung, in der auch viele christliche Sektierer und Außenseiter eine Heimat fanden. Trotz entschiedener Bekämpfung durch Kaiser und katholische Kirche war der Donatismus noch im 5. Jahrhundert virulent.

#### Follis:

Mit dem ursprünglich für einen Beutel mit Kupfermünzen gebräuchlichen Terminus „*follis*“ bezeichnet man die mit einem schwachen Silberüberzug versehenen Bronzemünzen Diokletians, die seit 293/94 bis zur Mitte des 4. Jahrhunderts bei zunehmender Gewichtsverminderung geprägt wurden. Der Silberüberzug sollte dieses Nominal als Silbermünze ausweisen, und als solche wurde sie durch das diokletianische Währungsdekret vom 1. 9. 301 in ihrem Wert verdoppelt.

#### Konzil:

Kirchenkonzile – und nur diese sind mit dem vom lateinischen „*concilium*“ abgeleiteten Begriff Konzil hier gemeint – demonstrierten auf eindrucksvolle Weise das Zusammenwachsen von Staat und Kirche seit der konstantinischen Zeit. Konstantin hat, obwohl er nicht getaufter Christ war, Bischofsversammlungen (Konzile bzw. Synoden) einberufen und ihnen – mit dem Einverständnis der Bischöfe – persönlich präsiert, wahrscheinlich nicht schon im Jahr 314 (Arles), gewiß aber im Jahr 325 (Nikaia). Beide Konzile wurden aufgrund (primär) innerchristlicher Probleme (Donatismus bzw. Arianismus) abgehalten, dennoch fühlte sich das Staatsoberhaupt zum Eingreifen aufgerufen. Protokolle und Beschlüsse der Konzile sind uns in den Konzilsakten erhalten und stellen eine bedeutende Quellengattung dar.

**Labarum:**

Das Labarum ist das mit dem Christogramm geschmückte kaiserliche Feldzeichen, mit dem Konstantin laut Eusebius bereits 312 die Schlacht an der Milvischen Brücke bestritten haben soll. In bildlicher Darstellung ist das Labarum erstmals für 327/28 zu belegen (auf der Rückseite einer in Konstantinopel geprägten Bronzemünze), die Verwendung bereits im Jahre 312 ist daher zweifelhaft.

**Multiplum:**

Unter diesem Begriff versteht man die Prägung eines ‚Vielfach-Nominals‘, also zum Beispiel ein 10-Aurei-Stück.

**Peristyl:**

Der Begriff bezeichnet eine Säulenhalle, die einen offenen Hof umgibt.

**Pontifex maximus:**

Seit Augustus war das republikanische Oberpriesteramt mit dem römischen Kaisertum eng verbunden – die Oberaufsicht über den gesamten kultischen und sakralen Bereich war zum Vorrecht und zur Pflicht des sich als Patron der Römer verstehenden Princeps geworden. Auch die christlichen Kaiser wahrten zunächst diese Tradition – erst Gratian hat den Titel 382 abgelegt, doch schon bei seinem Amtsantritt im Jahre 379 hatte Theodosius I. auf die Funktion des „pontifex maximus“ verzichtet.

**Prätorianerpräfekt:**

Seit Augustus, der das (zunächst kollegial besetzte) Amt des „praefectus praetorio“ geschaffen hatte, fungierten die Prätorianerpräfekten zunächst nur als Befehlshaber der kaiserlichen Elitetruppe, der Prätorianer. Im Laufe der Zeit erhielten sie auch zivile Aufgaben (vor allem juristischer Natur), bis Konstantin sie zu reinen Zivilbeamten machte, die mit weitreichenden Kompetenzen auf den Feldern der Verwaltung, des Steuerwesens und der Heeresversorgung ausgestattet wurden und zu den mächtigsten Männern des spätrömischen Reiches gehörten.

**Rostra:**

Eigentlich sind damit an Kriegsschiffen befestigte Schiffschnäbel zum Rammen feindlicher Schiffe gemeint. Hier jedoch ist es die Redtribüne auf dem Forum Romanum, die mit Schiffschnäbeln von den Schiffen besieger Gegner geschmückt worden war.

**Sassaniden:**

Diese neupersische Dynastie herrschte seit dem Jahr 224 in dem vorher parthischen Reich. Dem zweiten sassanidischen König, Shapur I., gelang es, den römischen Kaiser Valerian im Jahre 260 gefangen zu nehmen. Shapur II., der von 309 bis 379 regierte, befand sich in nahezu permanentem Kriegszustand mit den Römern, der auch durch den dreißigjährigen Friedensschluß mit dem Kaiser Iovian (363) nicht dauerhaft beendet werden konnte. Die Sassaniden büßten erst im Jahre 651 ihre Herrschaft ein.

**Sibyllinische Bücher:**

Die Bücher der Sibylle, der legendären Seherin von Cumae, besaßen in Rom die Bedeutung hochheiliger Orakelsprüche. Sie waren in griechischer Sprache verfaßt und sollen schon in der römischen Königszeit nach Rom gelangt sein, wo sie, da ihr Inhalt als geheim galt, unter strengem Verschluss gehalten wurden. Nur bei ungewöhnlichen Anlässen und bedrohlichen Ereignissen konsultierten speziell ausgesuchte Experten die „libri Sibyllini.“ Noch im späten 4. Jahrhundert hielten die Heiden an der Befragung der Bücher fest.

**Stadtpräfekt:**

Der „praefectus urbi“ war in der römischen Kaiserzeit der Stellvertreter des Kaisers in Rom, insbesondere auch in juristischer Hinsicht. Ferner oblag ihm die Aufsicht über die städtische Polizei und das Sorgen für Ruhe und Ordnung. In der Spätantike erlangten die Stadtpräfekten ihre höchste Bedeutung: Sie standen im Rang unmittelbar unter den Prätorianerpräfekten, leiteten Senatssitzungen und fungierten im Umkreis von 100 Meilen als Appellationsgericht. Constantius II. richtete auch für Konstantinopel das Amt des Stadtpräfekten ein.

**Terminalia:**

Das dem Jupiter heilige Fest der Terminalia wurde am 23. Februar begangen; es markierte das Ende des altrömischen Jahres.

**Thermen:**

Thermen sind römische Badeanlagen, die in bescheidener Form (wenige Räume zum Umkleiden sowie zum Kalt-, Lau- und Warmbaden), aber auch in prächtiger und aufwendiger Ausstattung als monumentale Baukomplexe begegnen. Letztere finden sich vor allem in Form der Kaiserthermen in Rom (zum Beispiel die Caracalla-Thermen und Diokletiansthermen). Großzügige Gewölbebauten mit aufwendiger Gestaltung (Marmorverblendungen, Mosaikböden), Parkanlagen und Palästreten bilden einen Gebäudekomplex, der nicht nur zum Baden diente, sondern mannigfaltige Möglichkeiten gesellschaftlichen, intellektuellen und sportlichen Vergnügens bot.

**Toga:**

Die Toga ist das klassisch-römische Bürgergewand. Erwachsene Bürger trugen die weiße Toga, welche die Ritter mit einem schmalen und die Senatoren mit breitem Purpurbesatz versahen. Bis in die Spätantike hinein blieb die Toga die in offiziellen Vorschriften geforderte Bekleidung zum Beispiel für Senatoren und Stadtpräfekten.

**tribunicia potestas:**

Die Amtsgewalt der Volkstribunen, die Augustus seit 23 v. Chr. in vollem Umfang besaß, hatte stets eine wichtige Quelle der kaiserlichen Macht gebildet: Ihr Inhaber genoss die Unverletzlichkeit, konnte gegen andere Magistrate einschreiten, den Senat einberufen und Gesetzesanträge an die Volksversammlung stellen. Obwohl die tribunizische Gewalt in der Spätantike, als die Kaiser kaum noch in Rom anzutreffen waren, ihre reale Bedeutung eingebüßt hatte, blieb sie zur Zeit der Tetrarchie noch regelmäßiger Bestandteil in den offiziellen Urkunden. Im Laufe des 4. Jahrhunderts taucht sie jedoch immer seltener auf und verschwindet nach Valentinian I. (375) fast vollständig.

**Tropaion:**

Das Tropaion, ein Siegesmal, wurde ursprünglich dort errichtet, wo der Feind die Wendung (griech. „trope“) zur Flucht angetreten hatte. Bereits in hellenistischer Zeit wurden aufwendige Tropaia als Siegesmonumente in Residenzstädten oder in Heiligtümern erbaut, und die Römer übernahmen diese Sitte.

**Tyche:**

Die griechische Göttin des Schicksals, Zufalls und Glücks entspricht weitgehend der römischen Fortuna. Sie wurde oft als Stadtgöttin betrachtet und als solche mit der Mauerkrone dargestellt.

**Velia:**

Die Velia ist ein felsiger Hügelrücken in Rom, welcher den Palatin, den Hügel der späteren Kaiserresidenzen, und den Esquilin miteinander verband. Das bedeutendste Monument auf der Velia im kaiserzeitlichen Rom war Hadrians riesiger Tempel für Venus und Roma.
